# Supplementary material
Source: publisher figshare collection journal article supplement (https://acs.figshare.com/ndownloader/files/17471855)
Supplement: Supplementary file 1 [file 17471855]

Archive with 3 entries (3 files):
- info.xml
- ao9b01260_high_quality.mp4
- ao9b01260.pdf
