# Supplementary material
Source: publisher figshare collection journal article supplement (https://acs.figshare.com/ndownloader/files/17471855)
Supplement: Supplementary file 1 [file 17471855 › info.xml]

<presentation>
	<article>
		<title>Urea Appended Amino Acid to Vitalized Yeast Growth, Enhance Fermentation and Promote Ethanol Production</title>
		<doi>10.1021/acsomega.9b01260</doi>
		<copyright>American Chemical Society</copyright>
		<narrator>Supriya Sasmal</narrator>
		<contact>Supriya Sasmal and Debasish Haldar</contact>
		<contact-email>deba_h76@yahoo.com</contact-email>
		<author-list>
			<author>Debasish Haldar</author>
		</author-list>
	</article>
	<slides height-width-ratio=".75">
		<slide audio-time="30">
			<subtitle/>
		</slide>
		<slide audio-time="30">
			<subtitle/>
		</slide>
		<slide audio-time="30">
			<subtitle/>
		</slide>
		<slide audio-time="20">
			<subtitle/>
		</slide>
		<slide audio-time="65">
			<subtitle/>
		</slide>
		<slide audio-time="55">
			<subtitle/>
		</slide>
		<slide audio-time="70">
			<subtitle/>
		</slide>
		<slide audio-time="80">
			<subtitle/>
		</slide>
	</slides>
	<audio duration="380"/>
</presentation>
